# Supplementary material
Source: PubMed Central journal article supplement (PMC3337961)
Supplement: NIHMS357040-supplement-1.pdf [file NIHMS357040-supplement-1.pdf]

## **UNC-6/Netrin mediates dendritic self-avoidance**

Cody J. Smith<sup>1</sup>, Joseph D. Watson<sup>1,4,5</sup>, Miri K. VanHoven<sup>2</sup>, Daniel A. Colón-Ramos<sup>3</sup> and David M. Miller III<sup>1,4,6</sup>

<sup>1</sup> Department of Cell and Developmental Biology, Vanderbilt University, Nashville, TN 37232-8240

<sup>2</sup> Department of Biological Sciences, San Jose State University, San Jose, CA.

<sup>3</sup> Department of Cell Biology; Yale Program in Cellular Neuroscience and Neurodegeneration and Repair, Yale University, New Haven NH.

<sup>4</sup> Neuroscience Program and Vanderbilt Kennedy Center, Vanderbilt University, Nashville, TN 37232

<sup>5</sup> Current address: Department of Biochemistry and Biophysics, The University of North Carolina, Chapel Hill, NC 27599-3280, USA

<sup>6</sup> Corresponding author: Department of Cell and Developmental Biology, Vanderbilt University, Nashville, TN 37232-8240

email address: david.miller@vanderbilt.edu

**Supplemental Table 1. Self-avoidance requires specific axon guidance molecules in the UNC-6/Netrin signaling pathway.** Mutants of known axon guidance molecules were tested for PVD 3<sup>0</sup> branch self-avoidance defects with the PVD::GFP reporter. Transcripts enriched ( $\geq 1.5X$ ,  $FDR \leq 1\%$ ) in PVD (Smith et al., 2010) are denoted with bold lettering. Only mutants of the UNC-6/Netrin signaling pathway showed self-avoidance defects that were significantly different from wt (+ indicates  $p < 0.01$ , Student's t-test).  $N \geq 20$

| Function      | Gene                           | Self-avoidance defect |
|---------------|--------------------------------|-----------------------|
| Ligand        | <i>unc-6/Netrin</i>            | +                     |
|               | <i>unc-129/TGF beta family</i> | -                     |
|               | <i>vab-1/Ephrin</i>            | -                     |
|               | <i>slt-1/Slit</i>              | -                     |
| Receptor      | <b><i>sax-3/Robo</i></b>       | -                     |
|               | <i>vab-2/Eph</i>               | -                     |
|               | <b><i>ptp-3/Lar</i></b>        | -                     |
|               | <b><i>unc-5/Unc-5H</i></b>     | +                     |
|               | <b><i>unc-40/DCC</i></b>       | +                     |
|               | <i>madd-2/NetrinR</i>          | -                     |
| ECM component | <i>nid-1/Nidogen</i>           | -                     |

## Supplemental Figure Legends

**Supplemental Figure 1. Mutants of *unc-40*, *unc-5* and *unc-6* show a range of dendritic morphogenesis phenotypes in addition to the self-avoidance defect. (a)**

PVD 1<sup>o</sup> processes project along the lateral nerve cord in the wild type but deviate from

a strict A/P trajectory in >75% of *unc-40*, *unc-5* or *unc-6* mutants. **(b)** Wild-type (wt)

PVD neurons show an asymmetric pattern of lateral branching that results in more

dorsal than ventral menorahs in 100% of cases examined (n > 15) (wild-type

distribution). In UNC-6/Netrin pathway mutants, this asymmetry is disrupted resulting in

PVD neurons that have more ventral menorahs than dorsal menorahs or an equal

number of menorahs on each side ~50% of the time (defective distribution), an outcome

that is consistent with a randomized probability of dorsal vs ventral initiation of 2<sup>0</sup>

branches (CJ Smith and DM Miller, manuscript in preparation). **(c)** The average number

of 2<sup>o</sup> dendrites/PVD neuron in *unc-6*, *unc-5* and *unc-40* mutants is reduced in

comparison to wild-type PVD neurons. **(d)**. Ectopic branching in adults is more frequent

in *unc-5(e271)* than in either wild type (wt) or *unc-40(e271)*.

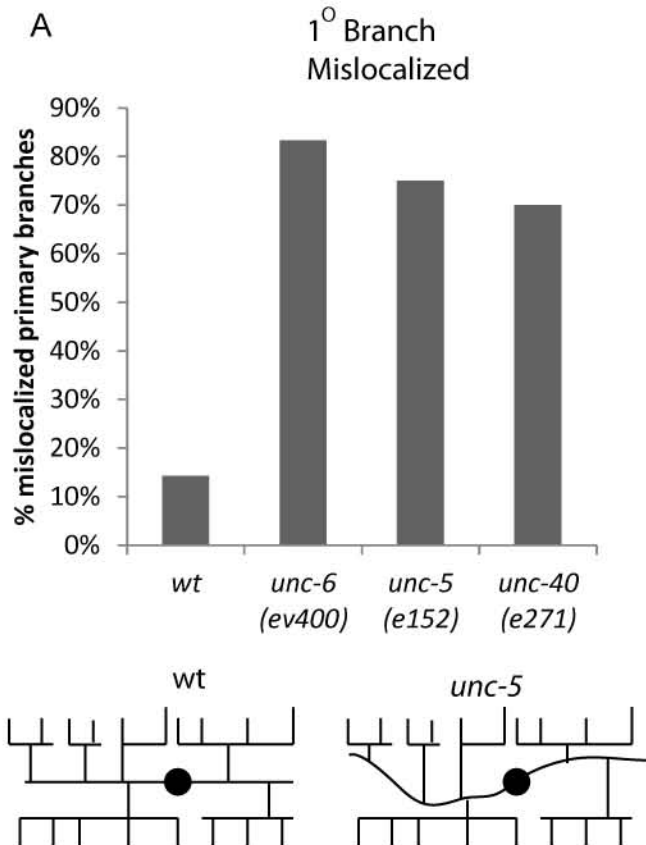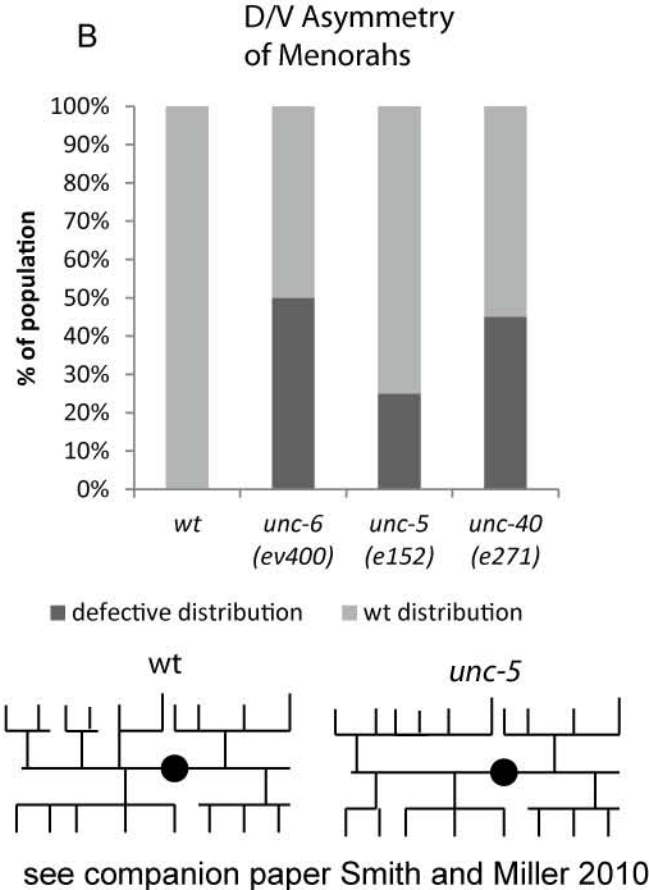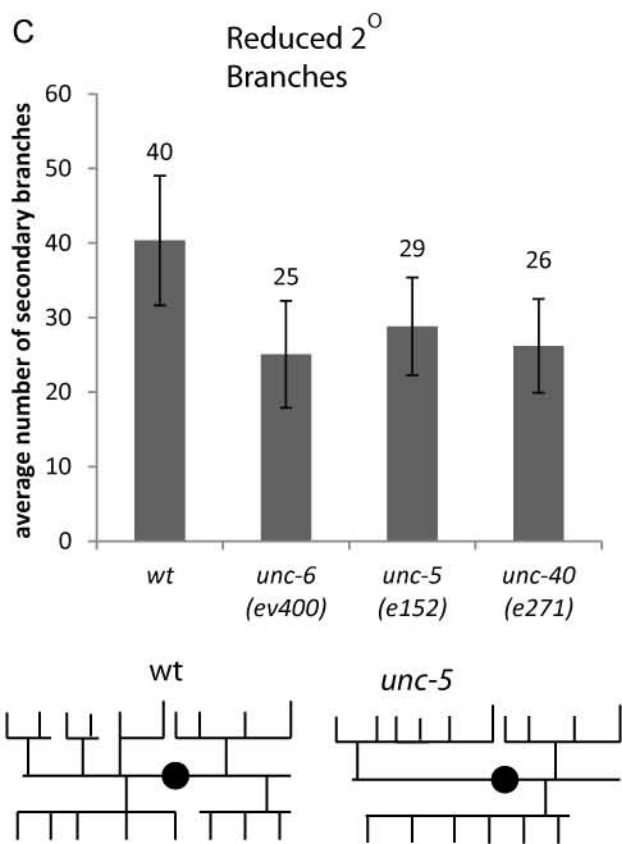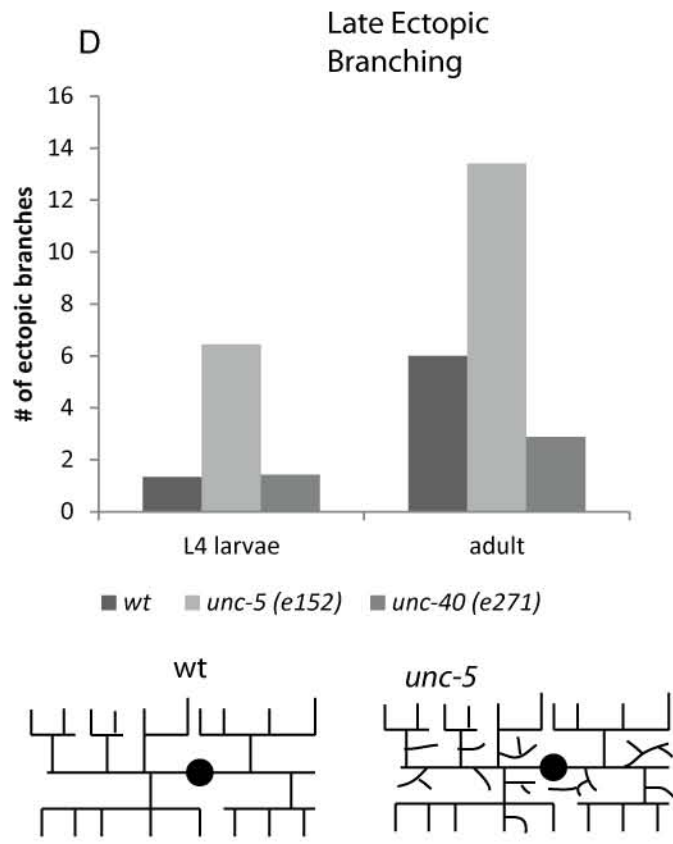

**Supplemental figure 2. *unc-40* and *unc-5* mutants show defects in contact-**

**dependent self-avoidance.** Quantification from movies of self-avoidance events in

wild type (wt), *unc-5 (e152)* and *unc-40 (e271)* show that 3<sup>o</sup> branches in *unc-5 (e152)*

and *unc-40 (e271)* do not retract as quickly as in wild-type animals; a majority (>75%) of

3<sup>o</sup> branches have failed to retract up to 10 minutes after initial contact in *unc-40* and

*unc-5* mutants whereas only 13% of 3<sup>o</sup> dendrites are still overlapping at this time point

in wild type.

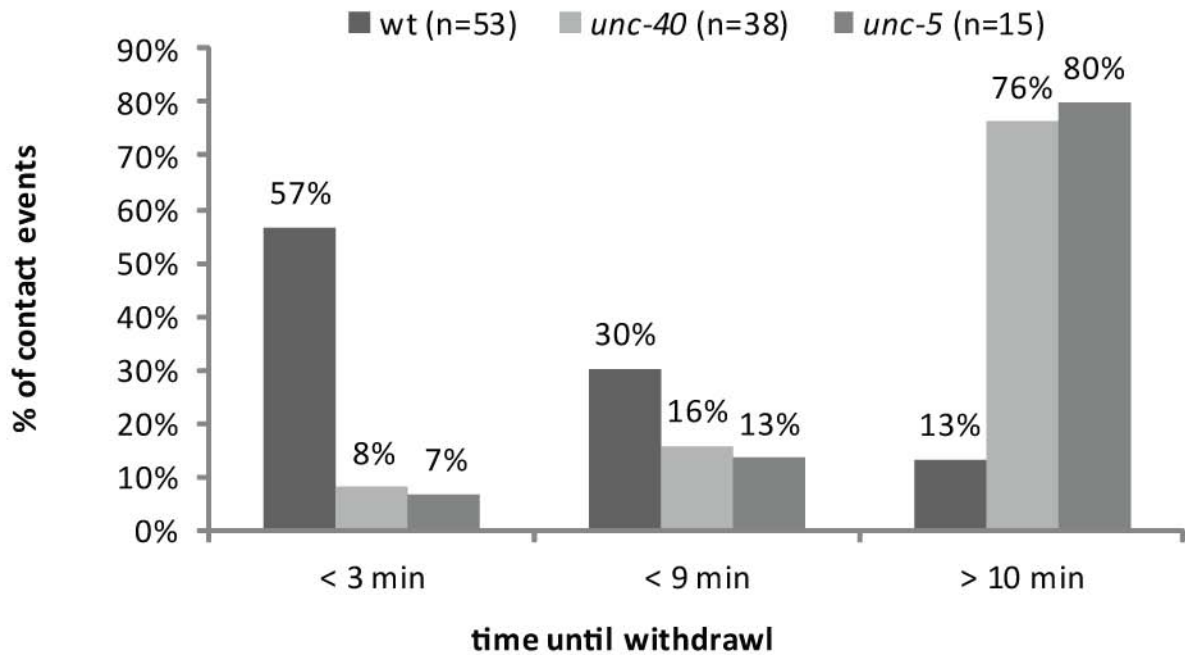

**Supplemental Figure 3. Genetic interactions of *unc-40*, *unc-5* and *unc-6*.** Single mutants of *unc-5* (*e152*), *unc-40* (*e271*) and *unc-6* (*ev400*) show comparable self-avoidance defects that are not statistically different from each other. The self-avoidance defect of the double mutant *unc-5* (*e152*); *unc-6* (*ev400*) is not significantly different from either *unc-5* (*e152*) or *unc-6* (*ev400*) single mutant which suggests that *unc-5* and *unc-6* function in a common pathway. *unc-40* (*e271*); *unc-5* (*e152*) double mutants do not show enhancement of the PVD self-avoidance defect vs *unc-40* (*e271*) but do show a more severe self avoidance defect than *unc-5* (*e152*) alone ( $p < 0.01$ ,  $n = 20$ , Students t-test). *unc-40* (*e271*); *unc-6* (*ev400*) double mutants show enhancement of self-avoidance defects compared to *unc-6* (*ev400*) but not to *unc-40* (*e271*) ( $p = 3E-3$  vs *unc-6* (*ev400*)). These results suggest that *unc-40* fulfills an additional *unc-5/unc-6*-independent role in self-avoidance.

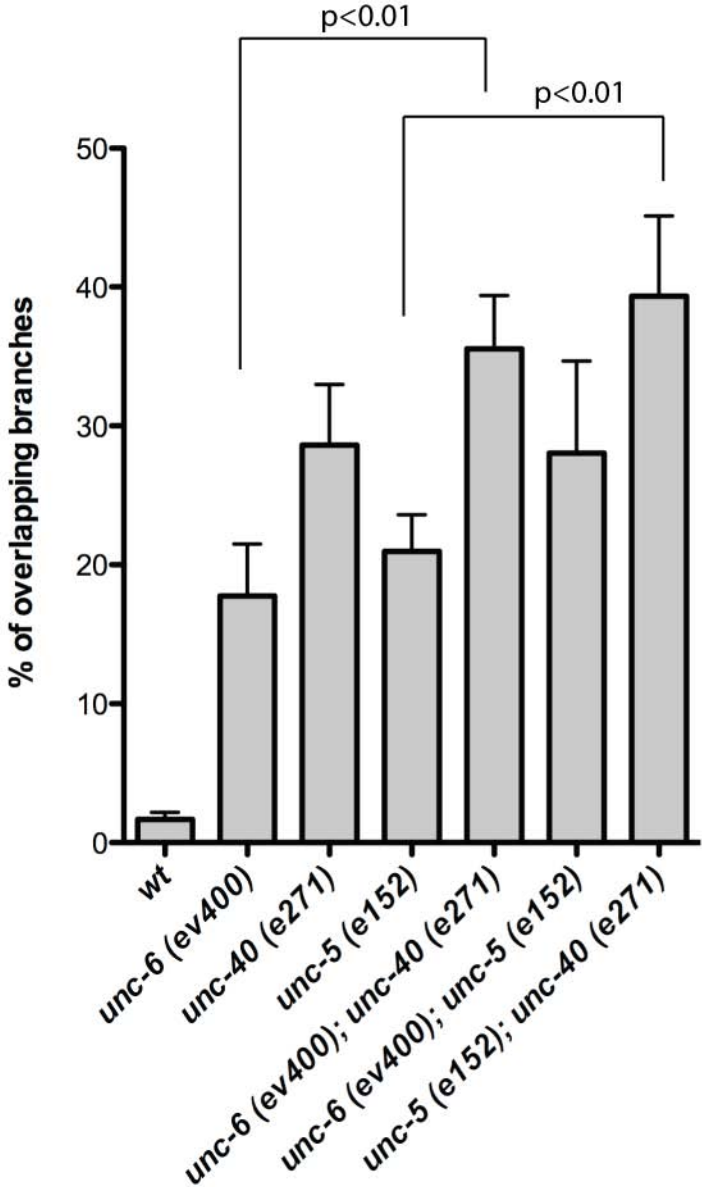



**Supplemental Figure 4. UNC-6/Netrin signaling mutants do not show differences in dorsal vs. ventral 3<sup>0</sup> dendrite self-avoidance phenotypes.** The fraction of overlapping 3<sup>0</sup> branches in dorsal vs ventral regions was scored for *unc-6(ev400)*, *unc-5(e152)* and *unc-40(e271)*. N = 20 animals

# dorsal vs ventral

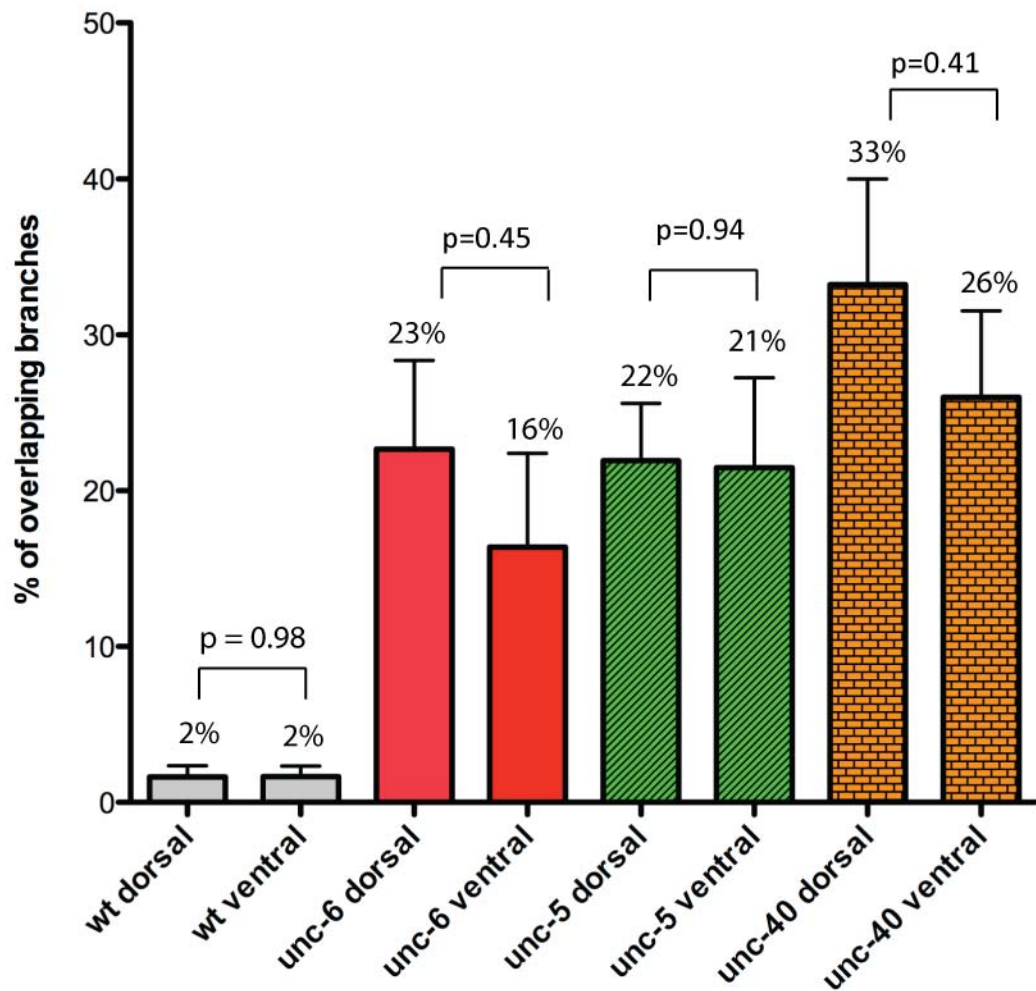

**Supplemental Figure 5. UNC-6/Netrin is required for self-avoidance during the L3 larval stage.** **(a)** Schematic of PVD development showing the elaboration of dendritic branches during larval development. **(b)** Experimental design for temperature shifts with the temperature sensitive mutant *unc-6(rh46)* to determine the temporal requirement for UNC-6 in PVD 3<sup>0</sup> dendritic branch self-avoidance. **(c)** Histogram showing fraction of overlapping 3<sup>0</sup> branches resulting from maintenance at either the permissive (15C) (15C control) or restrictive (25C) (25C control) temperatures and from upshift experiments (15C>25C) in which animals grown at permissive temperature are shifted to growth at the restrictive temperature. Note that the extent of overlapping 3<sup>0</sup> branches after shifting to restrictive temperature at the L2/L3 larval transition is not significantly different from the self-avoidance defect resulting from continuous exposure to 25 C whereas shifts to restrictive temperature at later developmental periods (*i.e.*, L3/L4 transition, L4/adult transition) result in a significantly lower fraction of overlapping 3<sup>0</sup> dendritic branches that is not significantly different from the PVD self-avoidance defect from 15C control animals. These results indicate that UNC-6/Netrin function is required before the L3 larval stage for 3<sup>0</sup> branch self-avoidance but is not necessary in older animals.

a. mid L2 larvae      L2/L3 transition      L3/L4 larvae transition      L4 larvae/adult transition

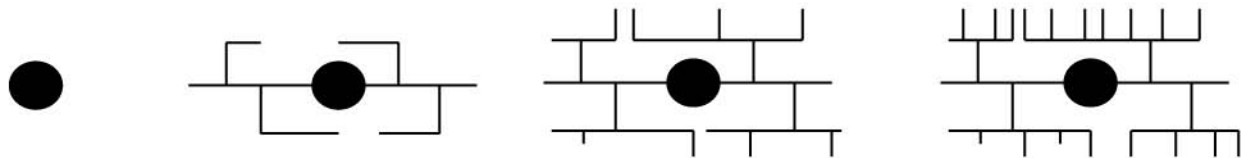

b.

Experimental Design

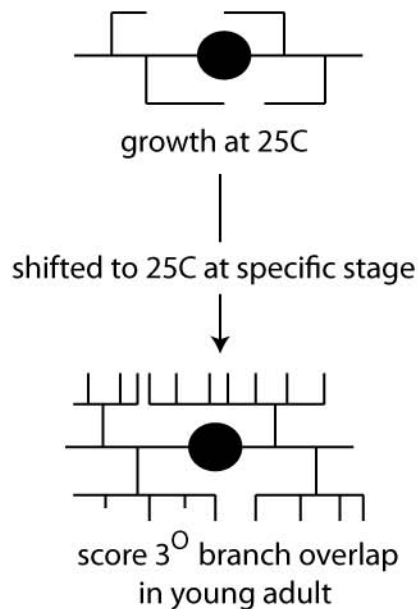

c.

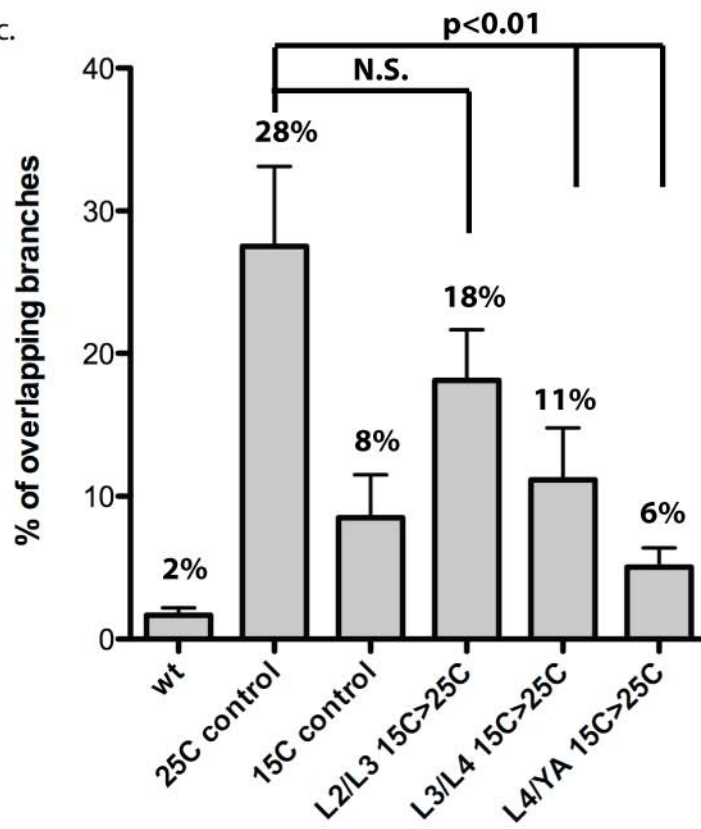

**Supplemental Figure 6. Expression of UNC-40/DCC in ventral cord motor**

**neurons rescues motor axon guidance defects. (a)** Histogram showing that 100% of *unc-25::GFP*-labeled GABAergic motor neurons extend circumferential commissures (MNCs) to the dorsal cord whereas only ~45% of MNCs reach the dorsal nerve cord in *unc-40 (e271)* (n = 20). MNC guidance defects are largely rescued by expression of UNC-40 in ventral cord motor neurons with the *unc-25* promoter (MNC::*UNC-40*). **(b)** Representative confocal images of wild type (wt), *unc-40 (e271)* and *unc-40 (e271); MNC::*UNC-40** adults. Arrows point to MNCs that fail to reach the dorsal nerve cord in *unc-40(e271)*. Axon guidance defects are not rescued in the PDE neuron that is labeled by a co-injected marker (*dat-1::mcherry*) in which expression of UNC-40 is not restored (arrow in MNC::*UNC-40*)

A

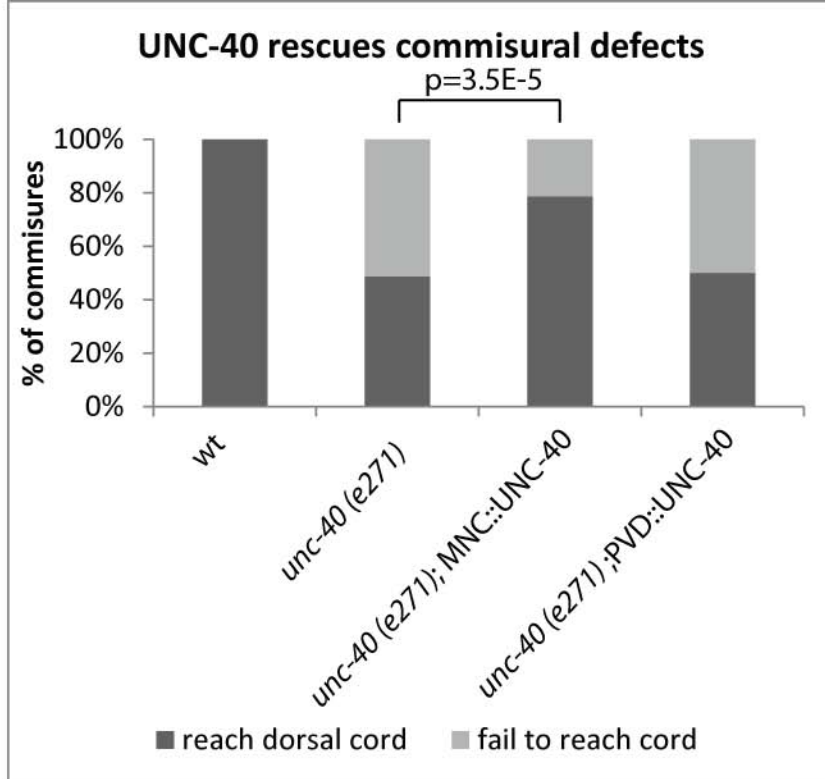

B

wt

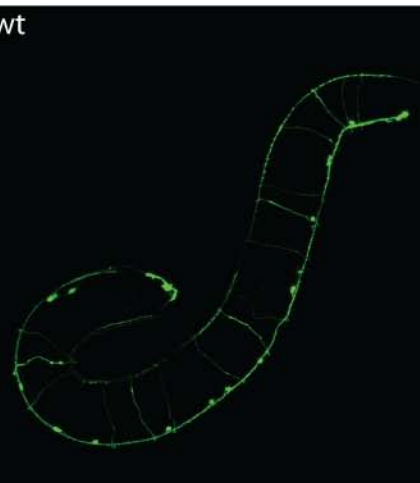*unc-40 (e271)*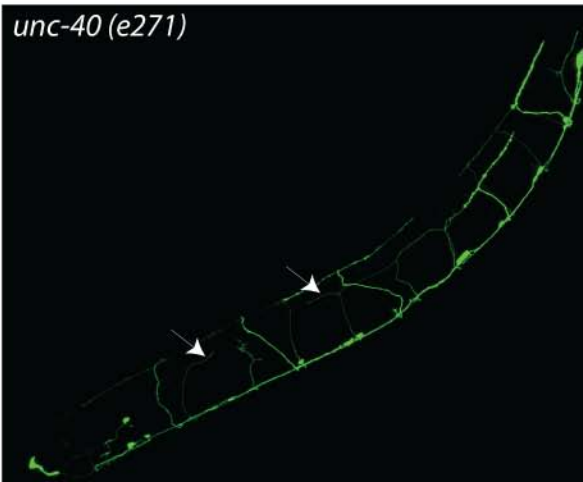*unc-40 (e271); MNC::UNC-40*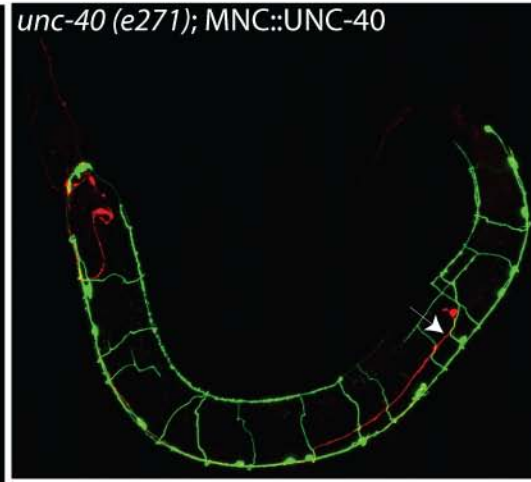

**Supplemental Figure 7. Expression of UNC-6::YFP in ventral motor neurons**

**labels the ventral nerve cord but is not detected at the wild-type PVD neuron. (a,b)**

In a wild-type animal, YFP-labeled UNC-6 (UNC-6::YFP) is detected in the cell body of ventral cord motor neurons (double-headed arrowheads) where it is expressed (*unc-6* promoter) and in the adjoining ventral nerve cord (arrow) but is not detectable in posterior lateral region in which the wild-type PVD neuron (arrowhead) and its dendritic arbor reside. **(c)** Schematic representation of UNC-6::YFP localization.

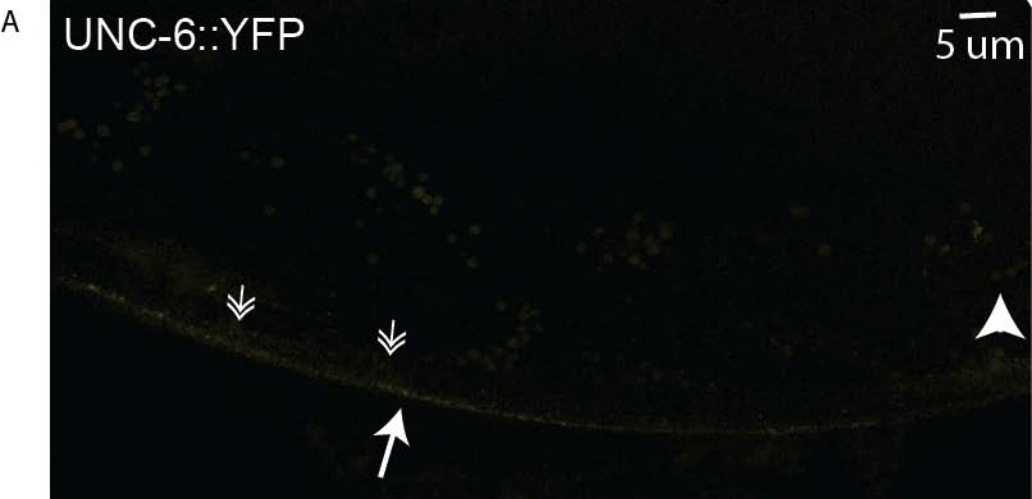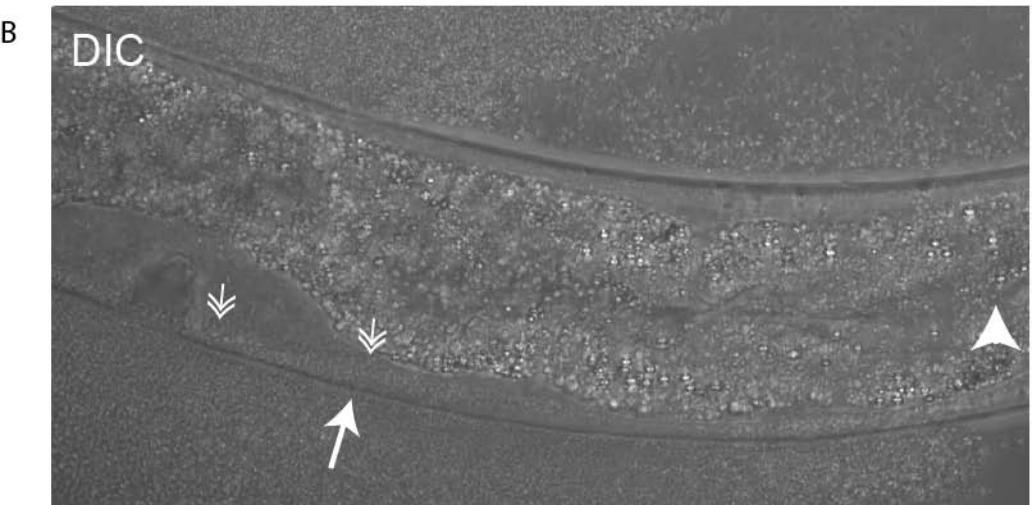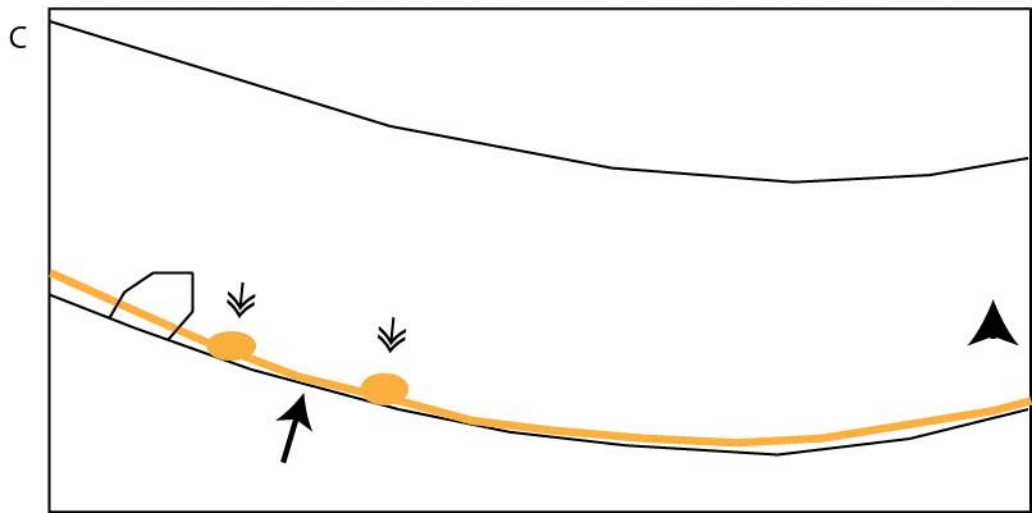



**Supplemental figure 8. Expression of the UNC-6::UNC-40 chimeric protein in ventral neurons does not rescue the Unc-6 PVD self-avoidance defect.**

Expression of ventral::UNC-6::UNC-40 in *unc-6 (ev400)* does not restore self-avoidance (*unc-6* vs ventral::UNC-6::UNC-40) whereas expression of a secreted form of UNC-6 in ventral neurons (ventral::UNC-6) or membrane-tethered UNC-6 in PVD (PVD:UNC-6::UNC-40) does rescue the Unc-6 self-avoidance defect. We note that expression of UNC-6::UNC-40 in ventral neurons enhances the PVD self avoidance defect of *unc-6(ev400)*; the mechanism of this effect is unclear. For histogram, genetic backgrounds are wild type (wt) (light grey box) or *unc-6(ev400)* (dark grey boxes).

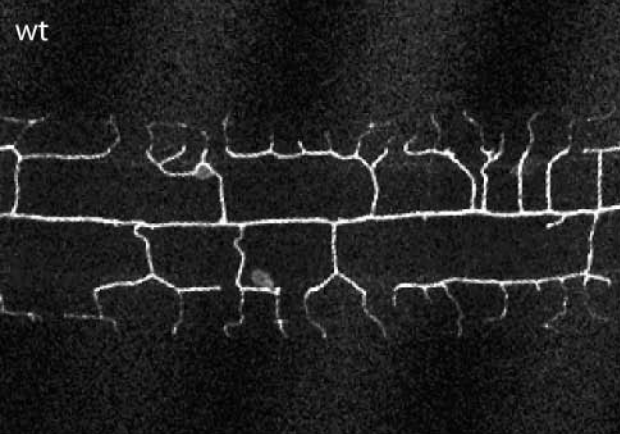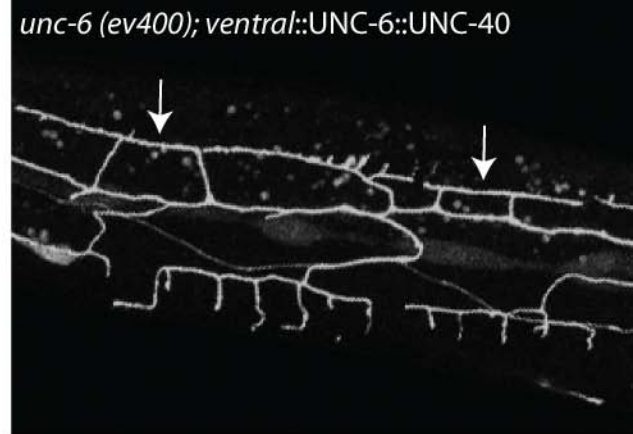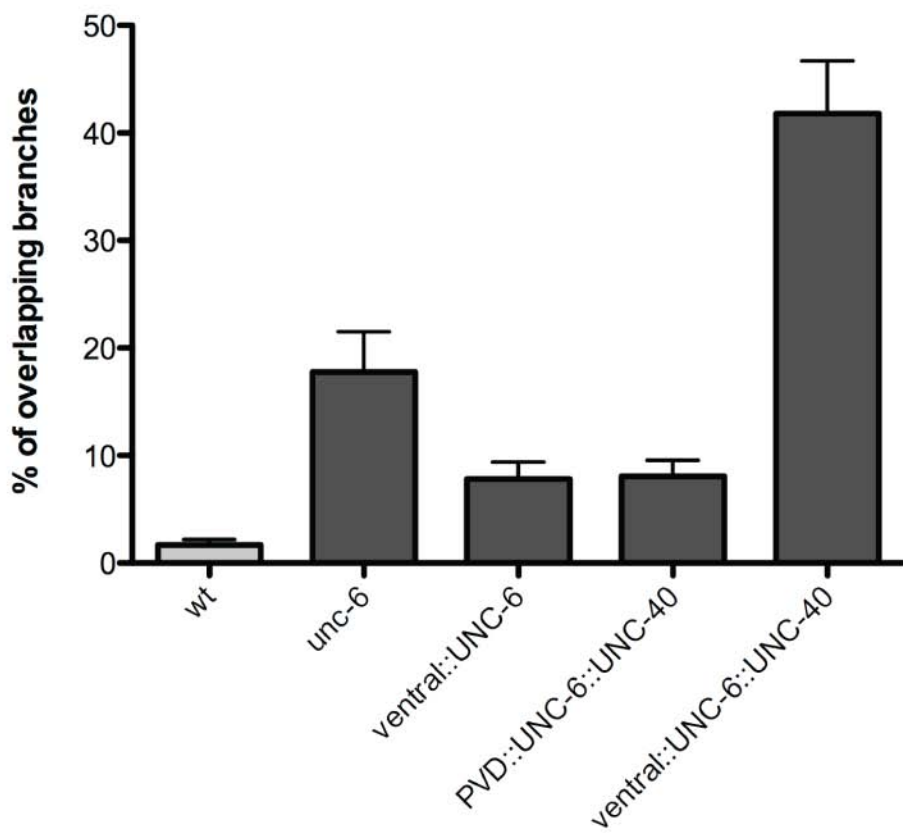

**Supplemental figure 9. Model: UNC-40/DCC captures UNC-6/Netrin at the tips of growing dendrites to mediate UNC-5-dependent mutual repulsion. (a)** UNC-6/Netrin functions with UNC-40 and UNC-5 through downstream effectors to reorganize the actin cytoskeleton for self-avoidance. UNC-40 also signals through an UNC-6/Netrin-independent pathway **(b)** Schematic showing distribution of UNC-6/Netrin expressed from ventral cells and focal UNC-6/Netrin localization to PVD dendritic branches. **(c)** Inset depicts the tips of adjacent sister dendrites where UNC-40/DCC captures UNC-6/Netrin for contact with UNC-5 and mutual repulsion.

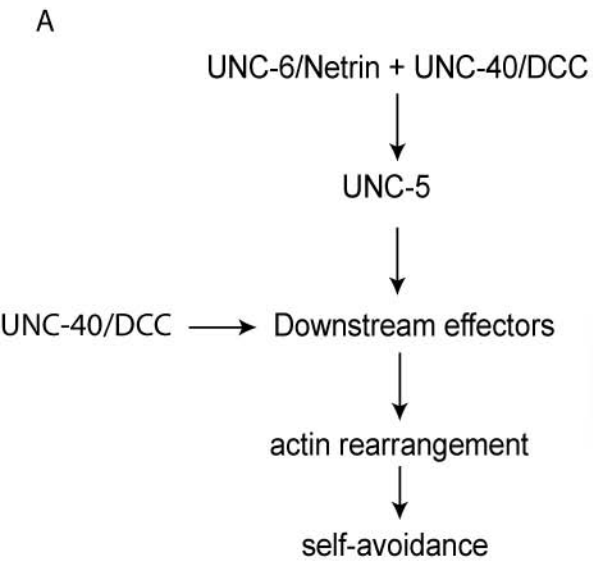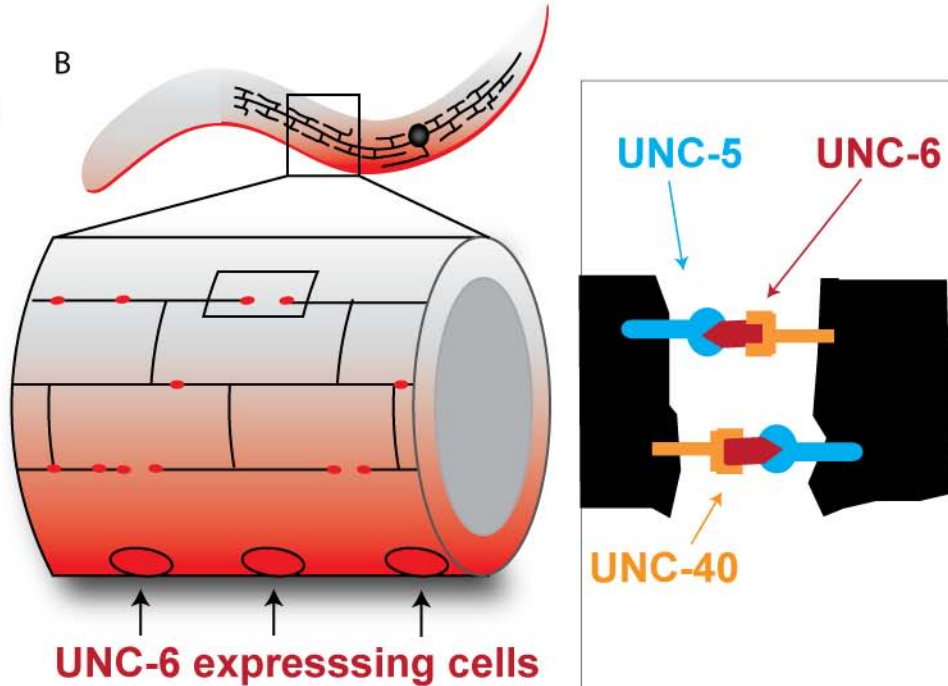

**Supplemental movie 1. Wildtype self-avoidance.** Time-lapse confocal movie of PVD::GFP in wild-type background. 3<sup>o</sup> dendrites contact but quickly retract (arrows). Note the intervening distance between 3<sup>o</sup> dendrites at the end of the movie is comparable to distance visualized in mature PVD neurons. Arrows indicate location of contact-dependent self-avoidance.

**Supplemental movie 2. Self-avoidance defect in *unc-40* (e271).** Time-lapse confocal movie of PVD::GFP in *unc-40* (e271). 3<sup>o</sup> dendrites grow toward each other but upon contact fail to retract. Arrow indicates location of failed self-avoidance.

**Supplemental movie 3. Self-avoidance defect in *unc-5* (e152).** Imaging of *unc-5* (e152) shows PVD dendrites fail to retract after contact. Arrow indicates location of failed self-avoidance.
